# Supplementary material for: Size-Dependent Cytoprotective Effects of Selenium Nanoparticles during Oxygen-Glucose Deprivation in Brain Cortical Cells
Source: MDPI journal article supplement (doi:10.3390/ijms23137464), 2022-07-05
Supplement: s1 [file s1]

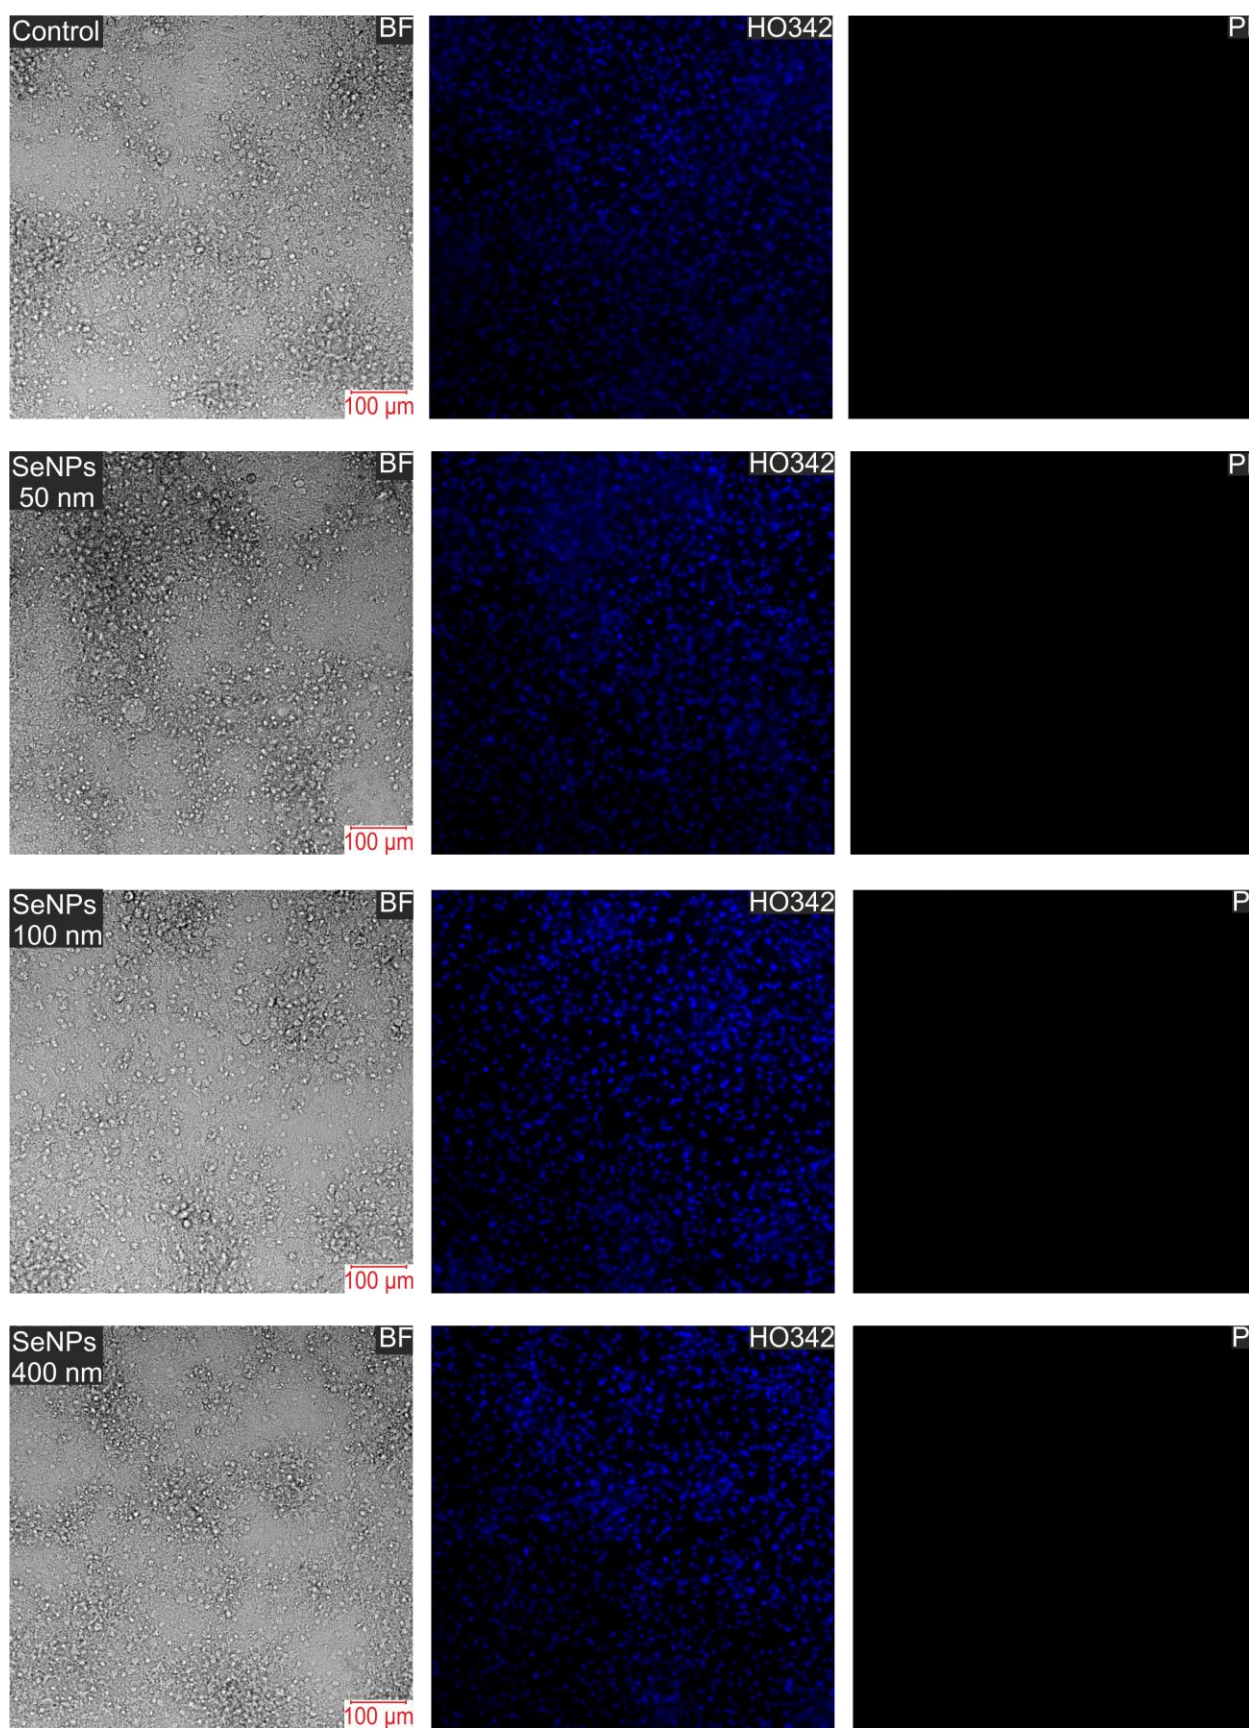

**SUPPLEMENTARY, FIGURE S1.** The effect of 24-hour incubation of cortical astrocytes with 3  $\mu\text{g}/\text{ml}$  of different-sized selenium nanoparticles. Double staining of cells with Hoechst 33342 (HO342), Propidium iodide (PI) and Bright-field microscopy (BF).
